# Supplementary material for: An Expressed Sequence Tag (EST)-enriched genetic map of turbot (Scophthalmus maximus): a useful framework for comparative genomics across model and farmed teleosts
Source: PubMed Central journal article supplement (PMC3464660; doi:10.1186/1471-2156-13-54), 2012-07-02
Supplement: 1471-2156-13-54-S1.pdf [file 1471-2156-13-54-S1.pdf]

LG03Q1

LG03Q2

LG03Q3

LG03Q4

LG03Q6

LG03HF

LG03DF

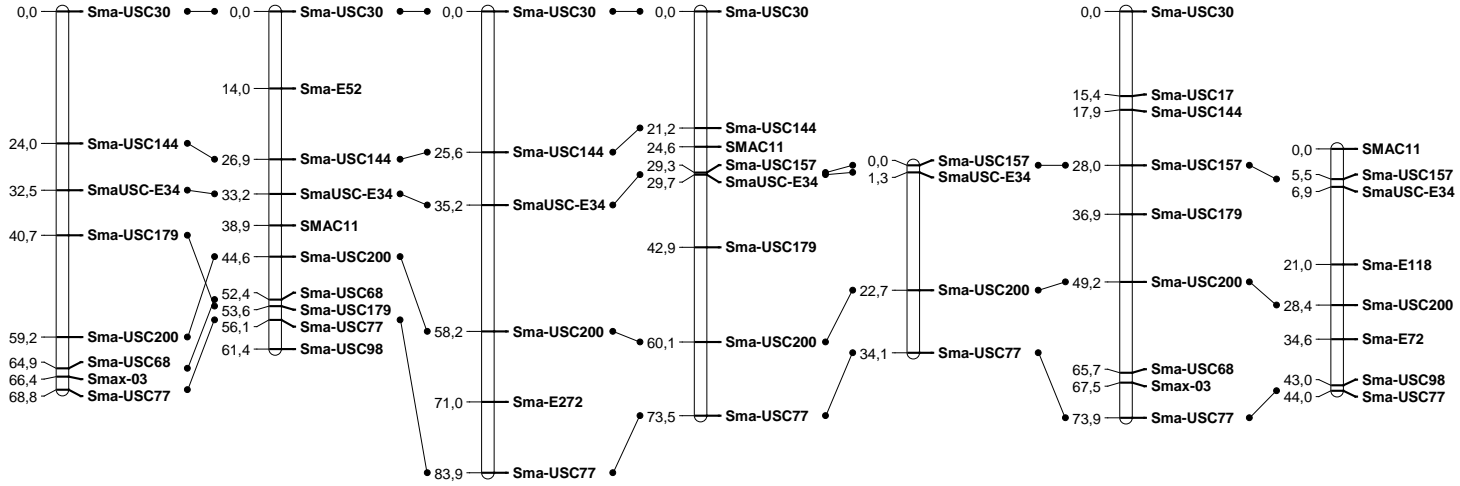

LG04Q1

LG04Q2

LG04Q3

LG04Q4

LG04Q5

LG04Q6

LG04Q7

LG04HF

LG04DF

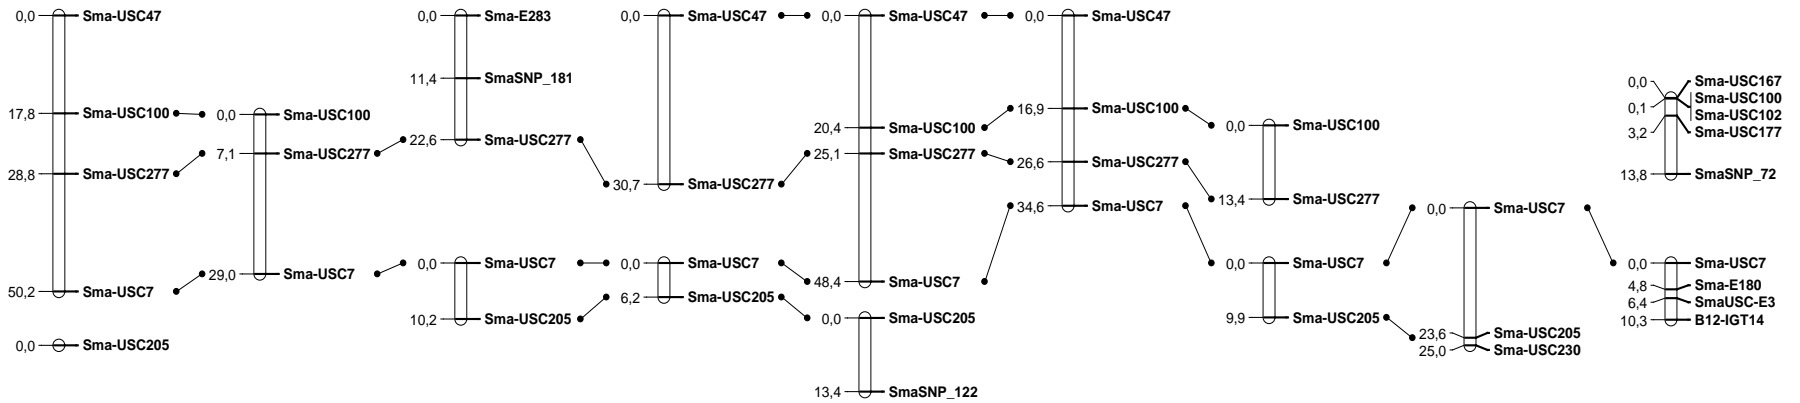

LG05Q1

LG05Q2

LG05Q3

LG05Q4

LG05Q6

LG05Q7

LG05HF

LG05DF

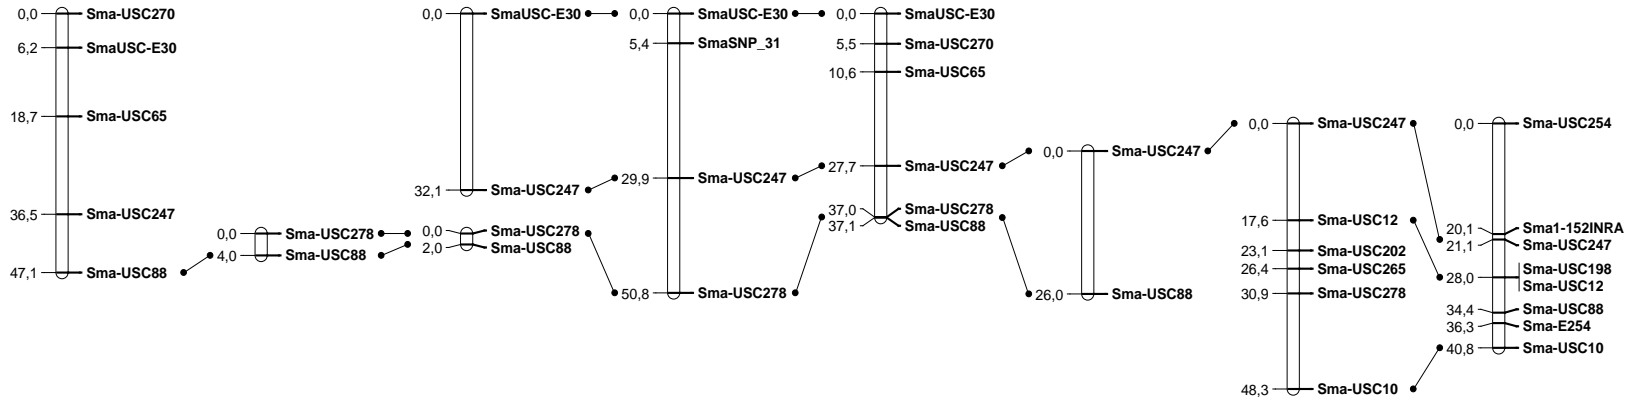

LG06Q2

LG06Q3

LG06Q5

LG06Q6

LG06Q7

LG06HF

LG06DF

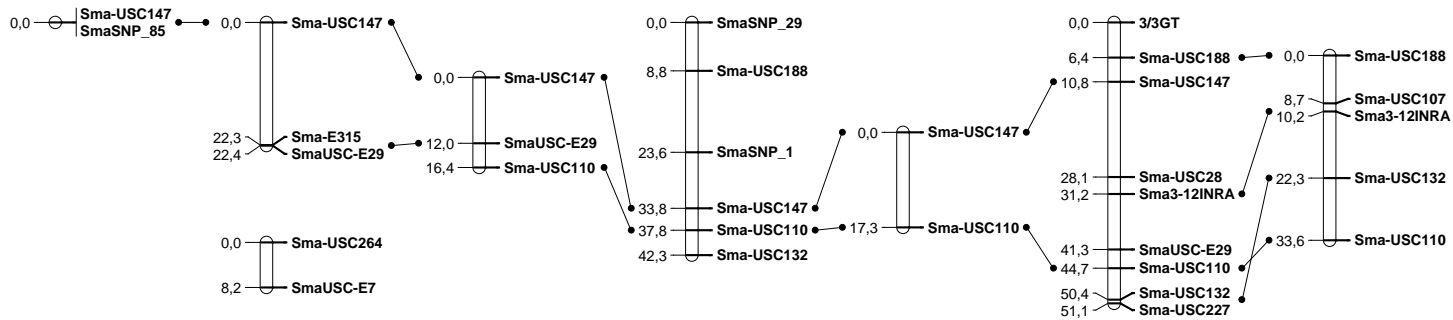

LG07Q1

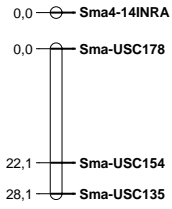

LG07Q2

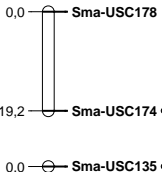

LG07Q3

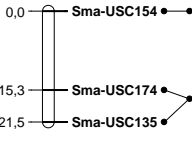

LG07Q4

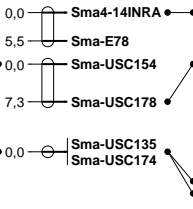

LG07Q5

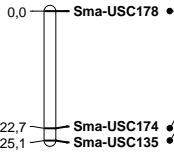

LG07Q6

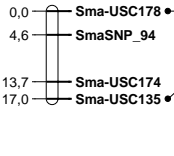

LG07Q7

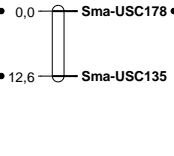

LG07HF

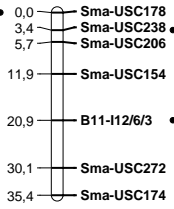

LG07DF

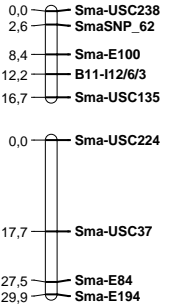

LG08Q1

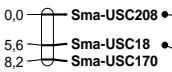

LG08Q2

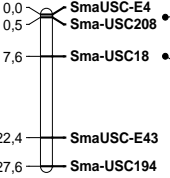

LG08Q3

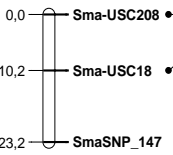

LG08Q4

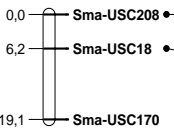

LG08Q5

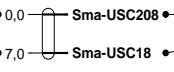

LG08Q6

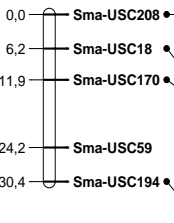

LG08Q7

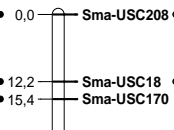

LG08HF

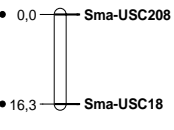

LG08DF

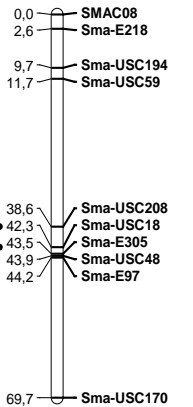

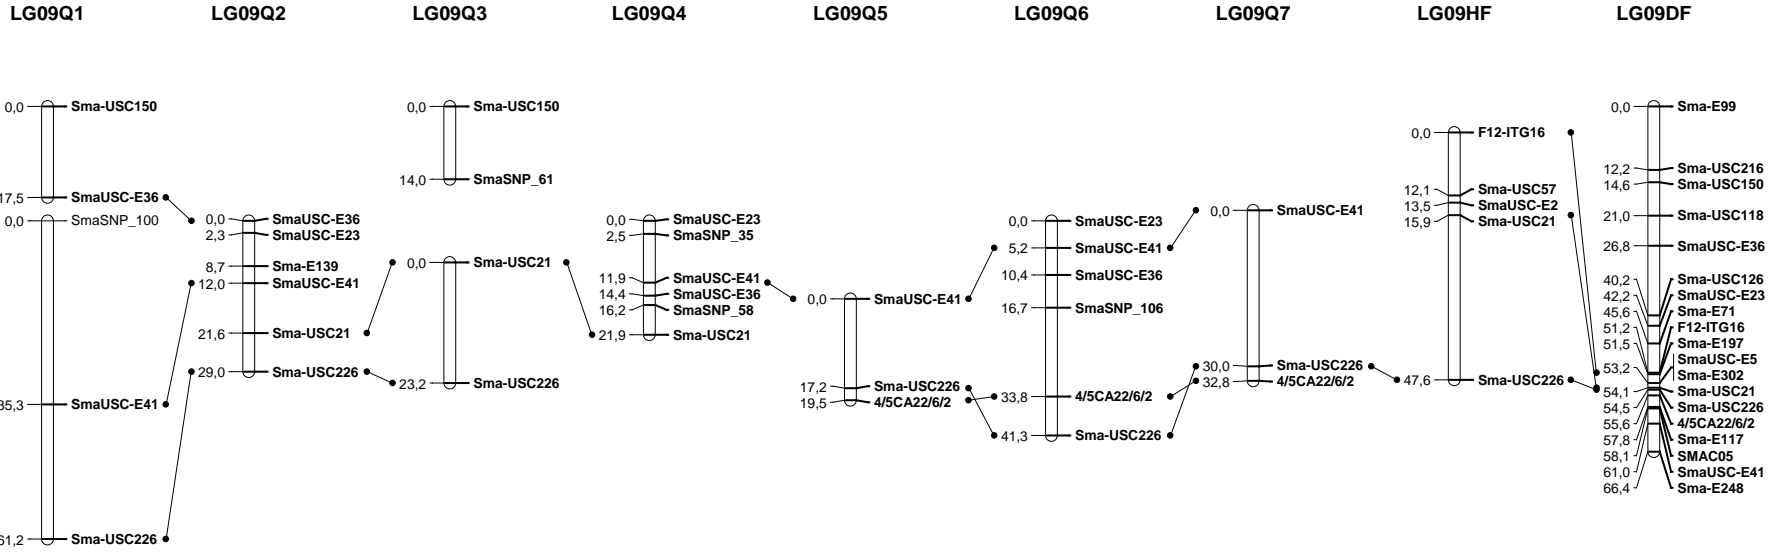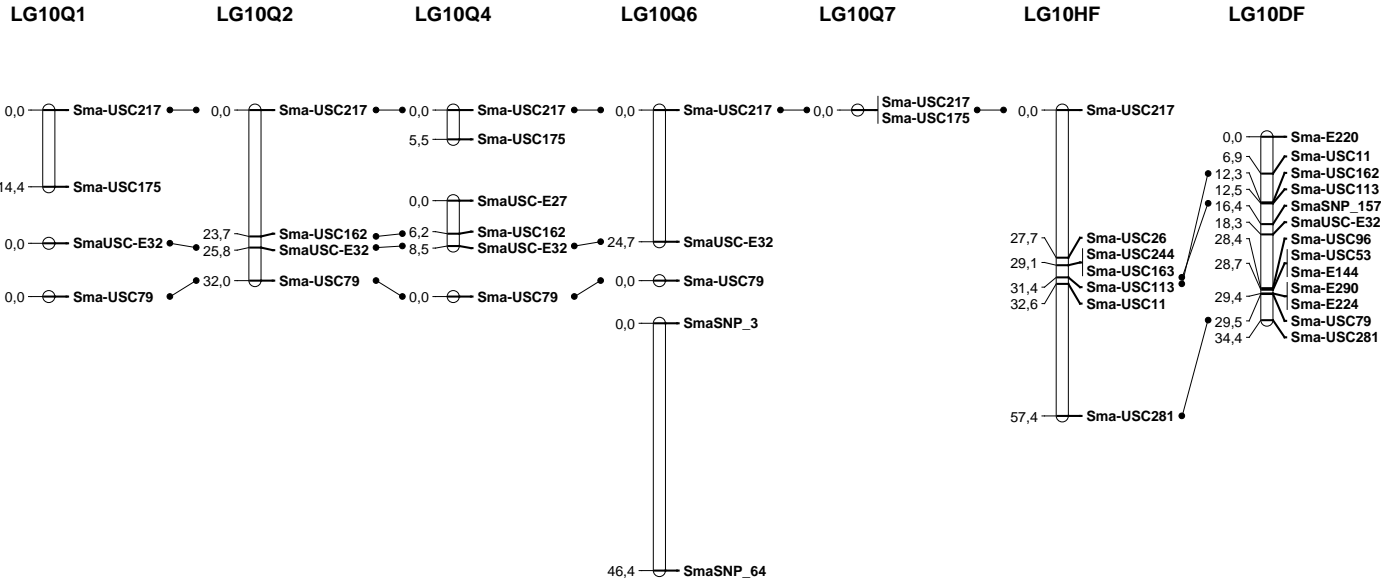



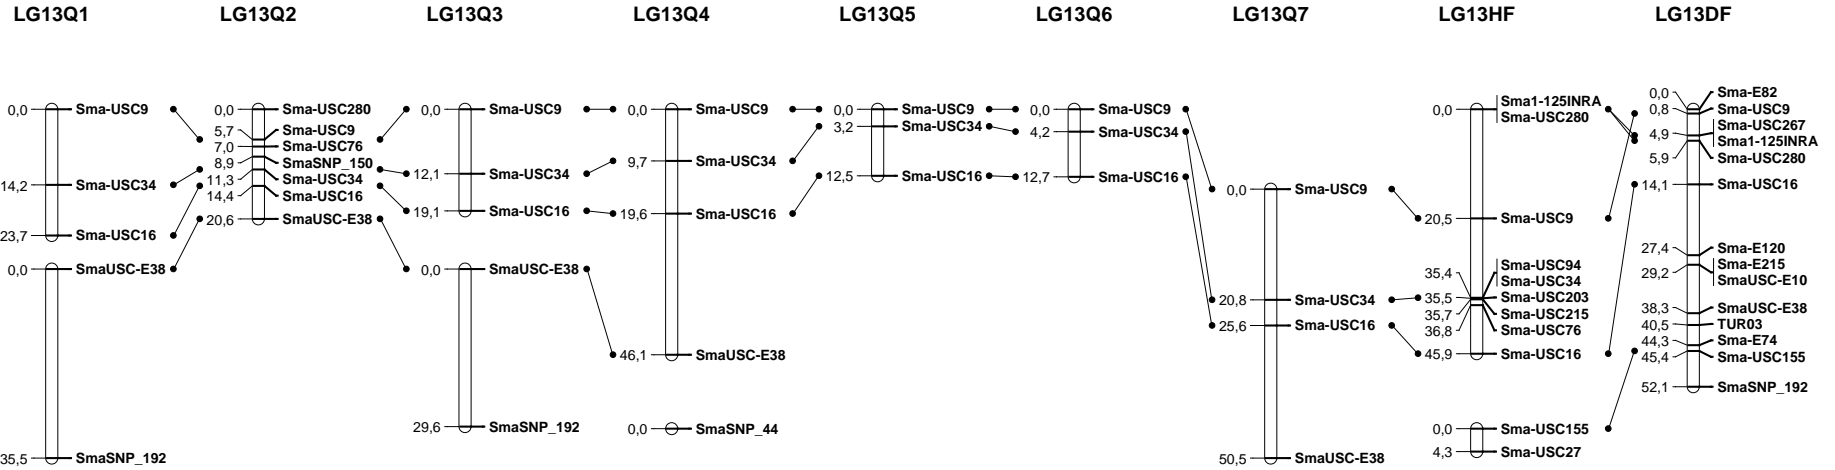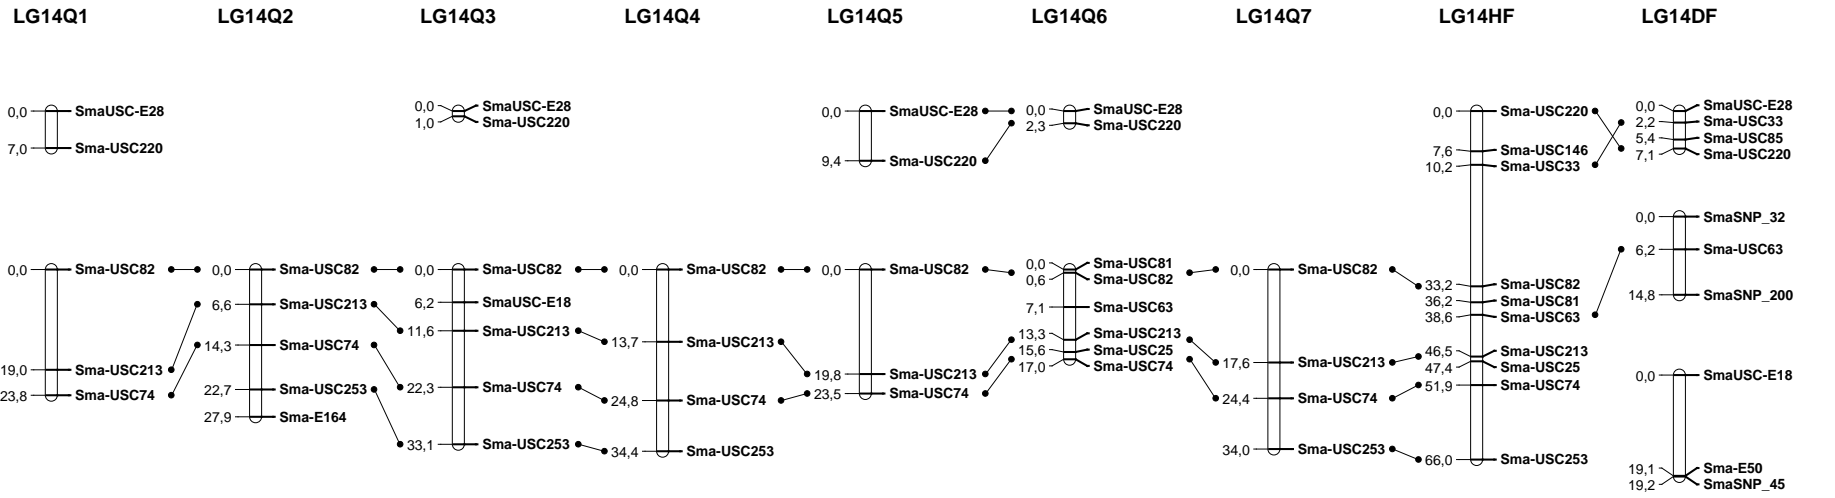

LG15Q1

LG15Q2

LG15Q3

LG15Q4

LG15Q5

LG15Q6

LG15Q7

LG15HF

LG15DF

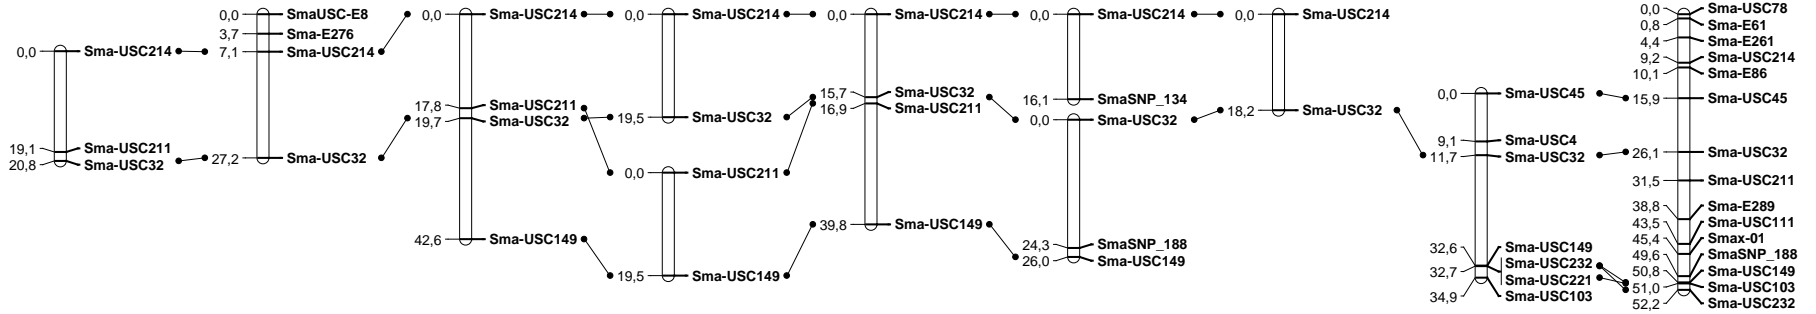

LG16Q1

LG16Q2

LG16Q3

LG16Q4

LG16Q5

LG16Q6

LG16Q7

LG16HF

LG16DF

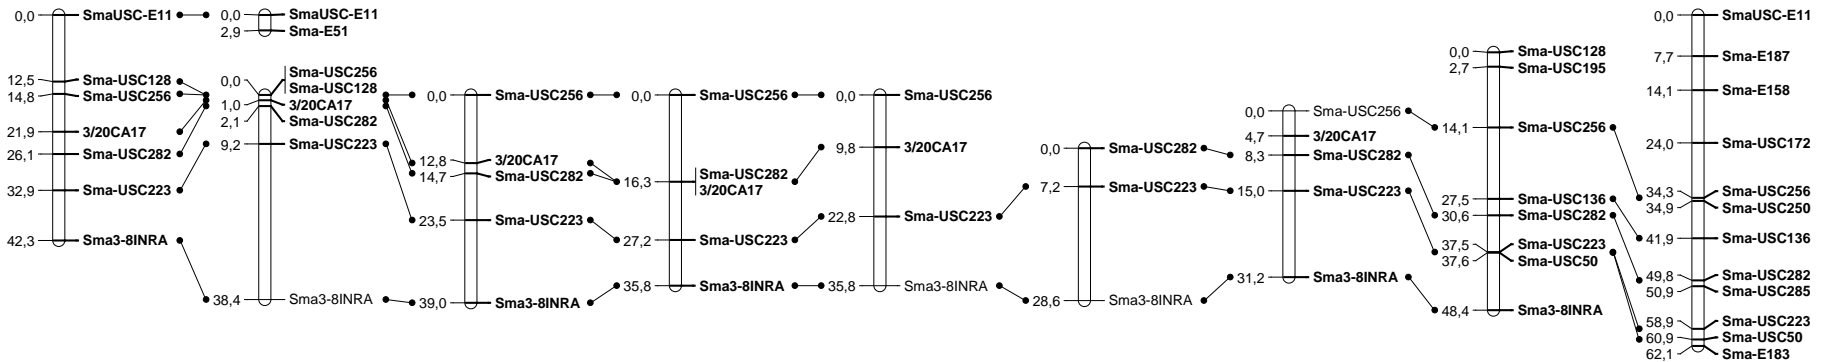





LG20Q1

LG20Q2

LG20Q4

LG20Q6

LG20Q7

LG20HF

LG20DF

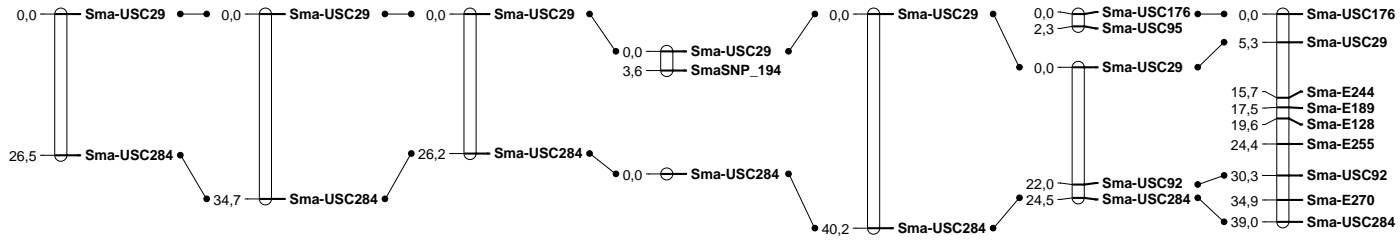

LG21Q2

LG21Q3

LG21Q4

LG21Q5

LG21Q7

LG21HF

LG21DF

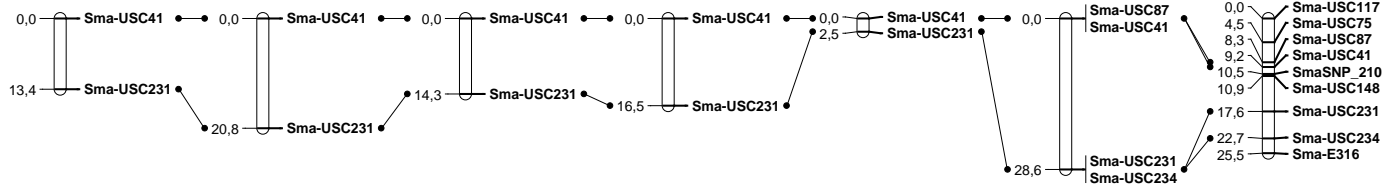

LG22Q1

LG22Q2

LG22Q4

LG22Q5

LG22Q6

LG22Q7

LG22HF

LG22DF

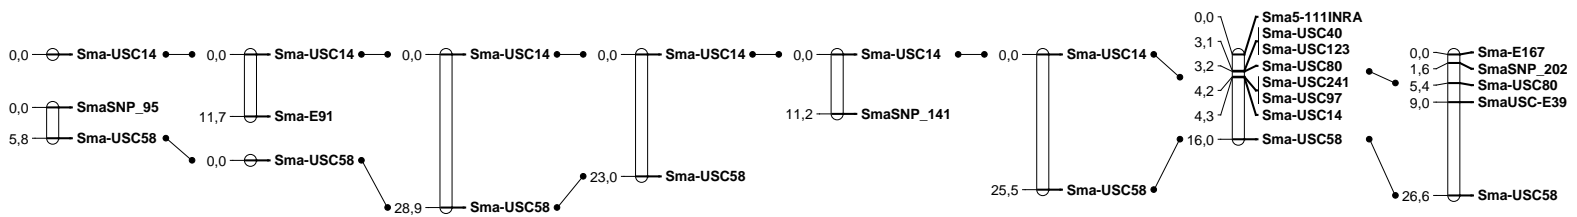

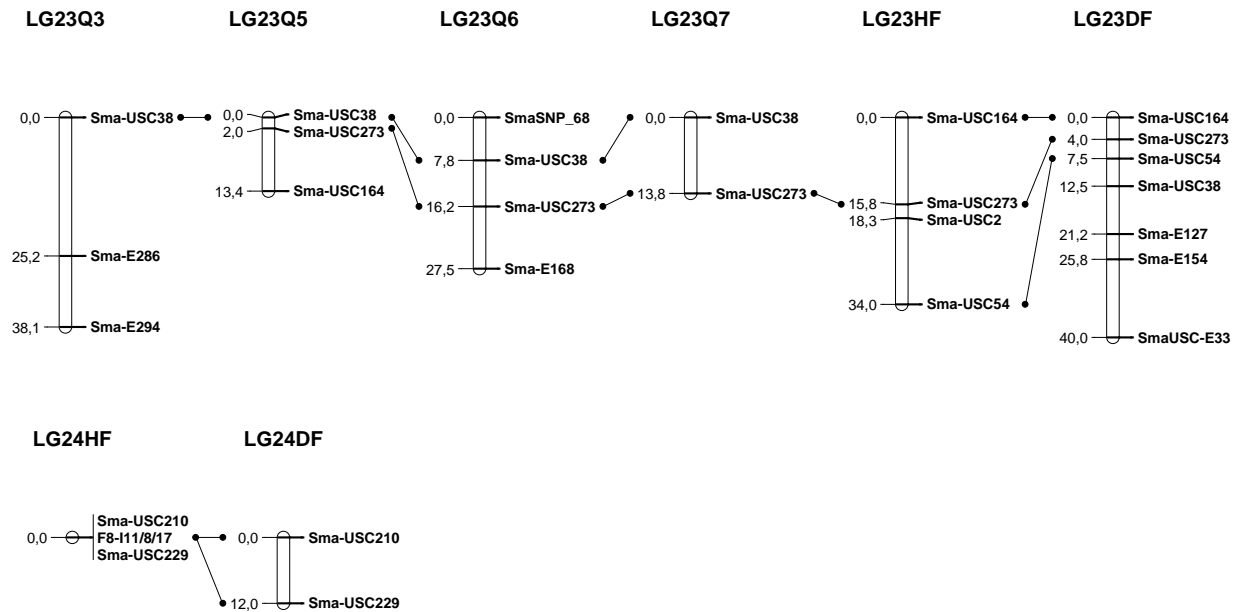

**FIGURE S1.-** Correspondence between the nine family maps used to construct the turbot consensus map.
