# Supplementary material for: An Expressed Sequence Tag (EST)-enriched genetic map of turbot (Scophthalmus maximus): a useful framework for comparative genomics across model and farmed teleosts
Source: PubMed Central journal article supplement (PMC3464660; doi:10.1186/1471-2156-13-54), 2012-07-02
Supplement: 1471-2156-13-54-S2.pdf [file 1471-2156-13-54-S2.pdf]

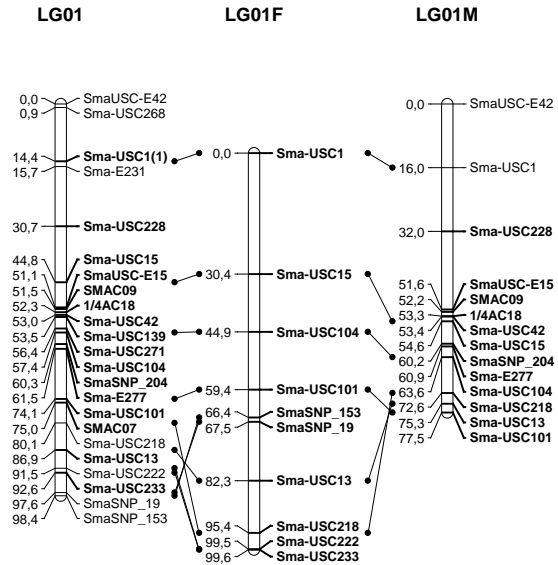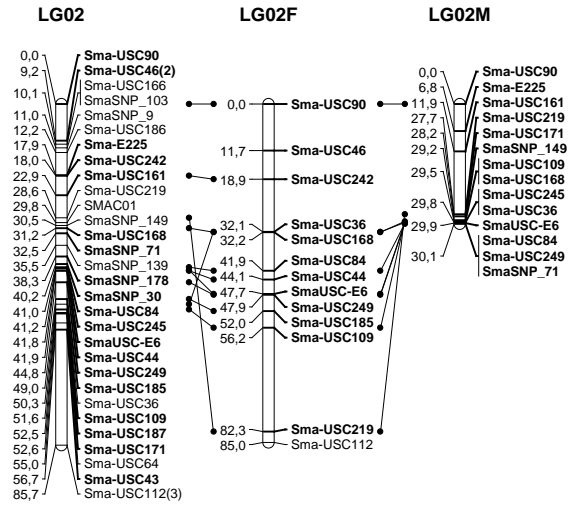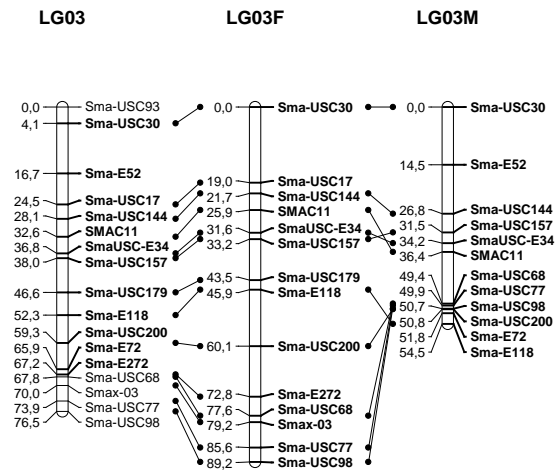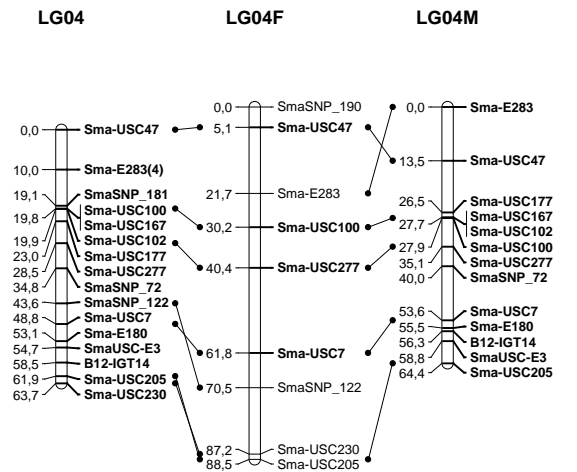

**LG05**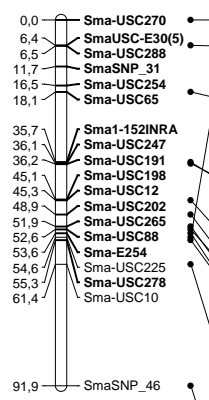**LG05F**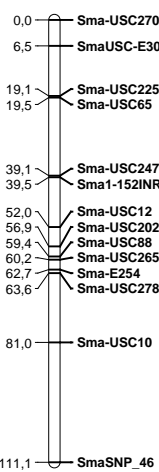**LG05M**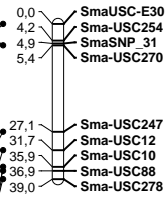**LG06**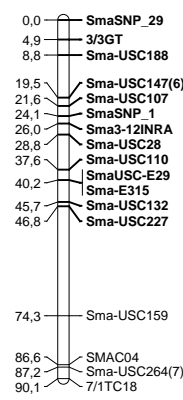**LG06F**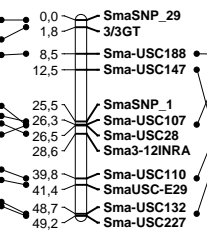**LG06M**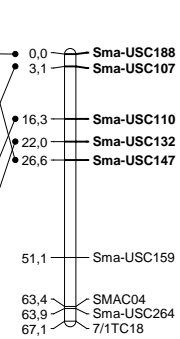**LG07**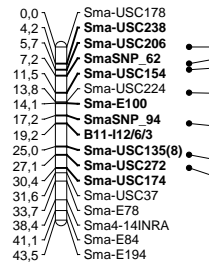**LG07F**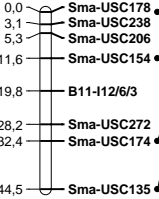**LG07M**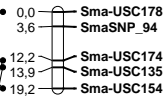**LG08**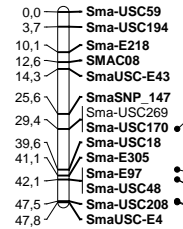**LG08F**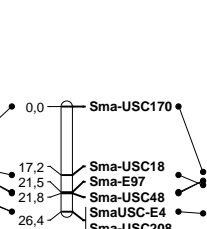**LG08M**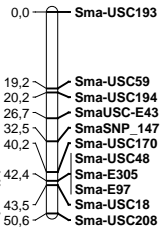

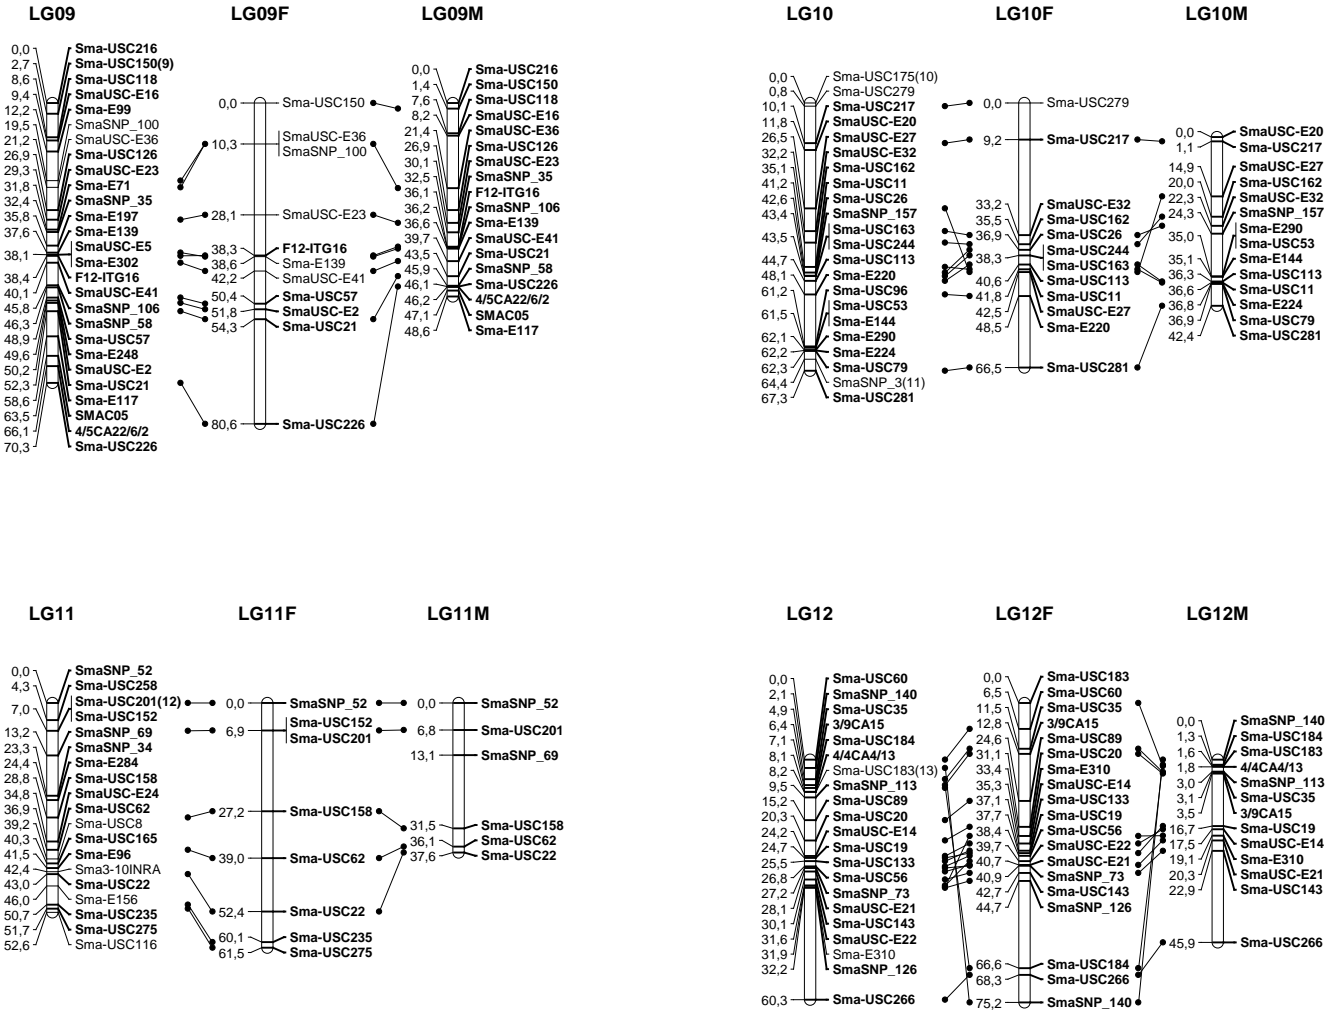

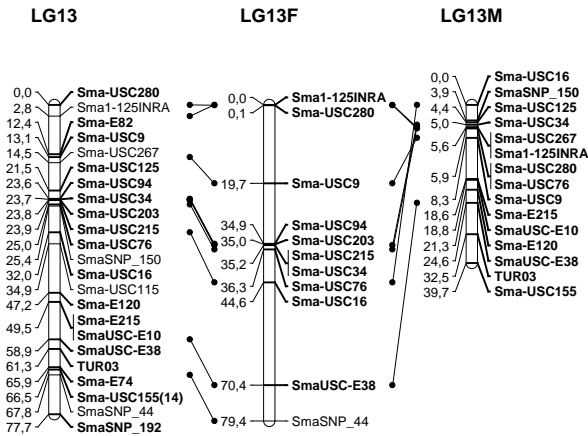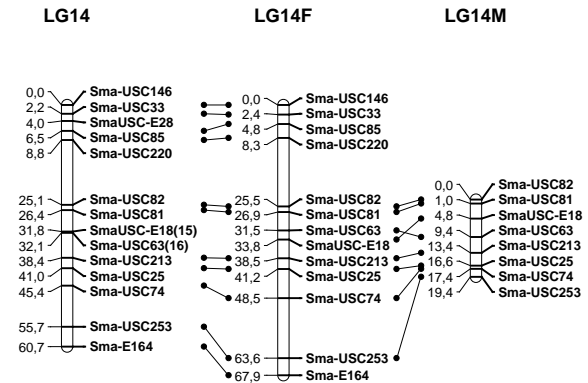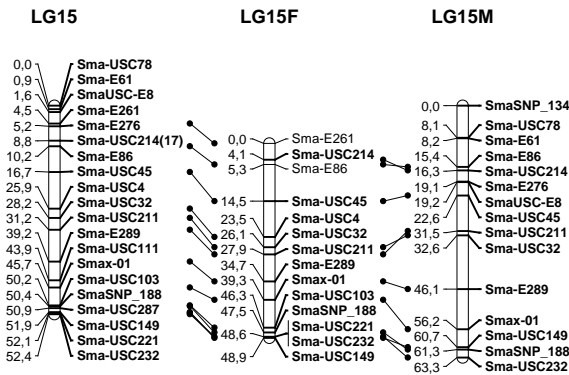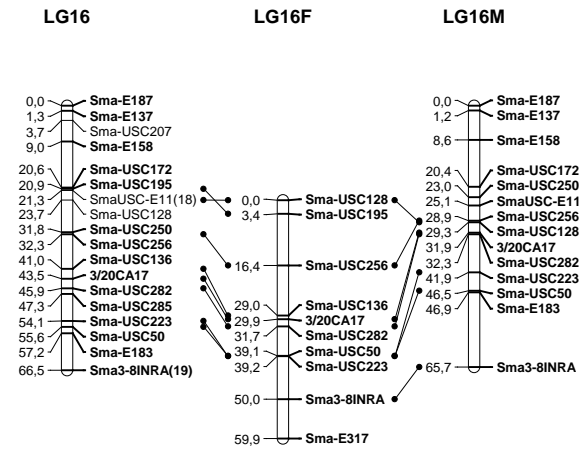

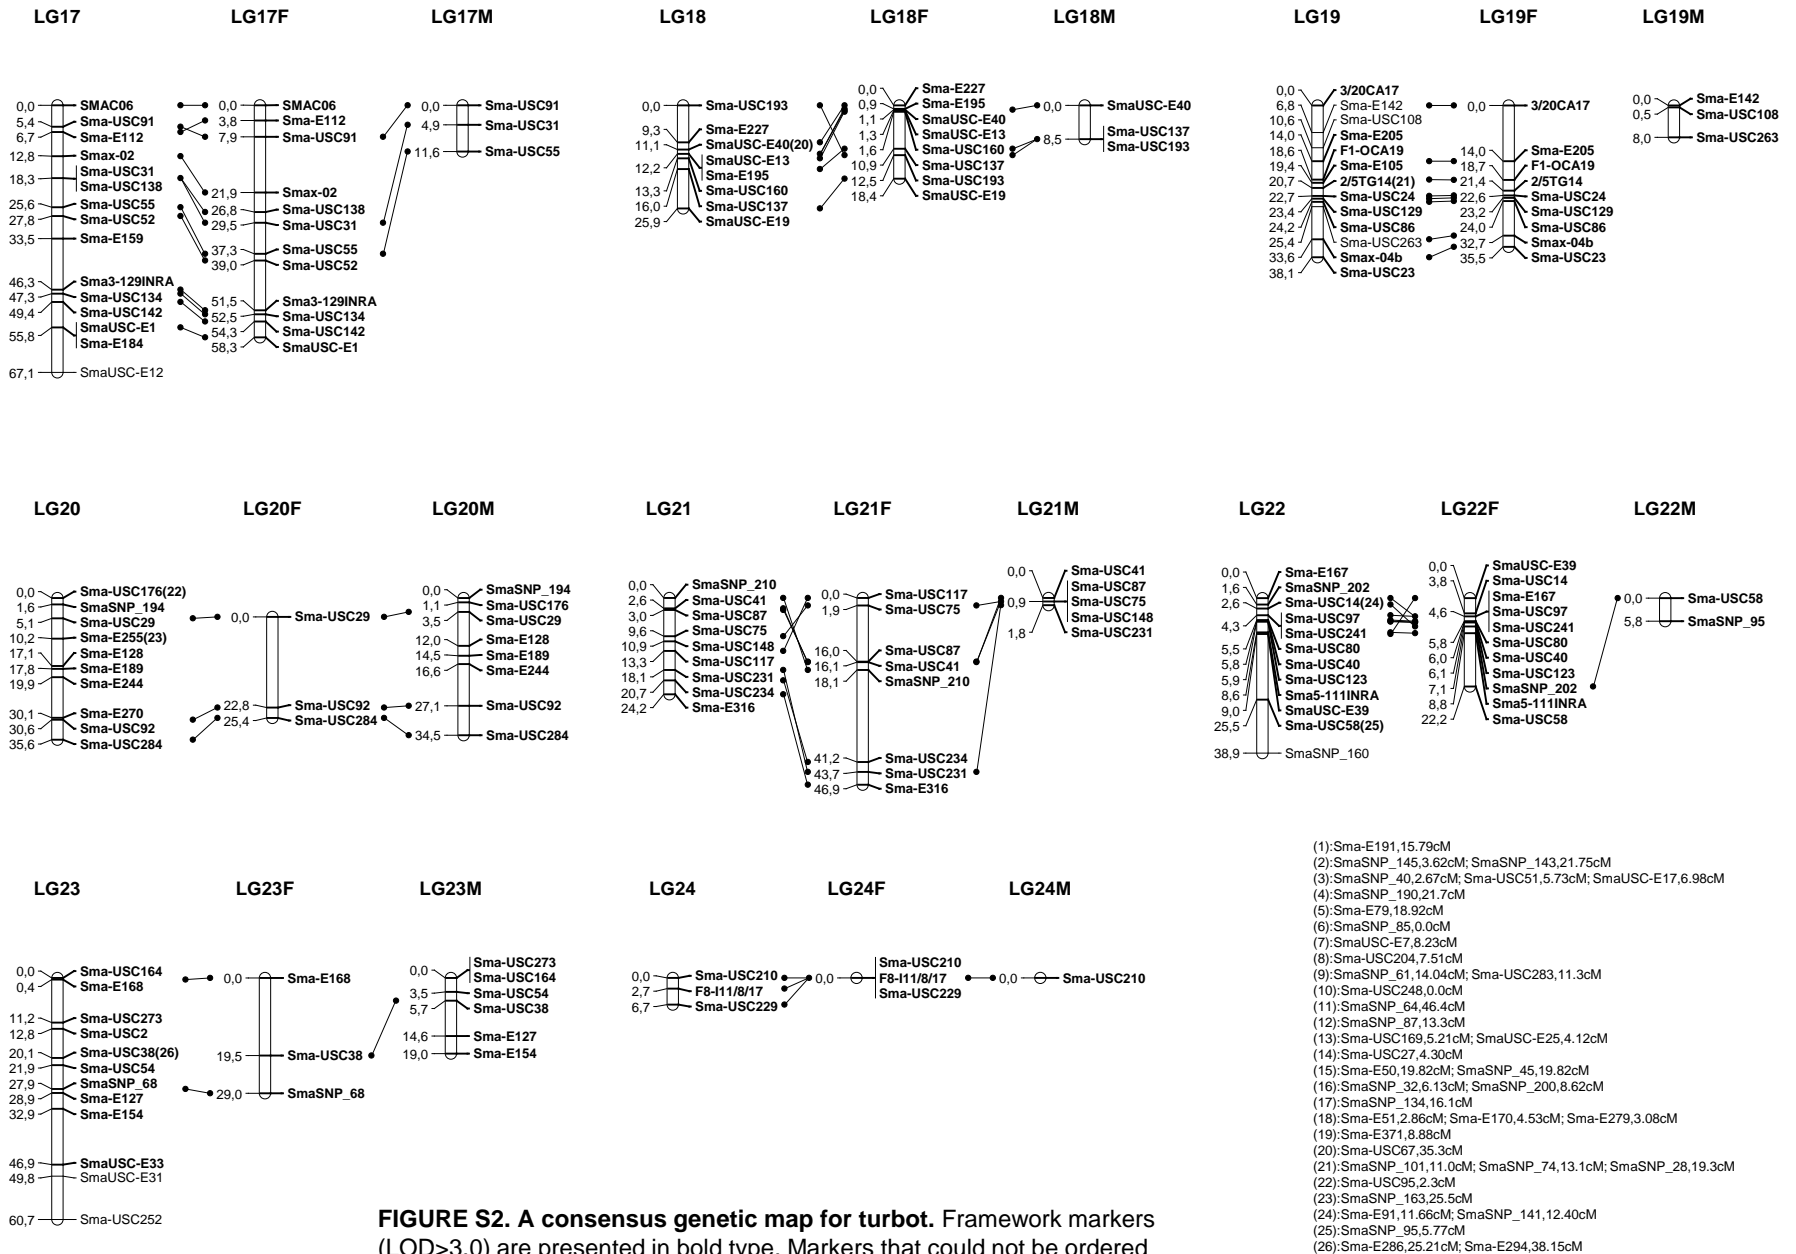

**FIGURE S2. A consensus genetic map for turbot.** Framework markers (LOD>3.0) are presented in bold type. Markers that could not be ordered with a log-likelihood support are represented as accessory markers at the right of the nearest linked marker
