# Supplementary material for: An Expressed Sequence Tag (EST)-enriched genetic map of turbot (Scophthalmus maximus): a useful framework for comparative genomics across model and farmed teleosts
Source: PubMed Central journal article supplement (PMC3464660; doi:10.1186/1471-2156-13-54), 2012-07-02
Supplement: 1471-2156-13-54-S3.pdf [file 1471-2156-13-54-S3.pdf]

| LG01              | Gac   | Tetr  | Ola | Tru  | Dre |
|-------------------|-------|-------|-----|------|-----|
| <i>Sma-E191</i>   | -     | 6     | -   | 10   | 2   |
| SmaUSC-E42        | sc120 | 15-un | 17  | 22un | -   |
| Sma-USC268        | 2     | 5     | -   | -    | 25  |
| <b>Sma-USC1</b>   | 18    | 14    | 24  | 16   | -   |
| <i>Sma-E231</i>   | 3     | un    | 17  | -    | -   |
| <b>Sma-USC15</b>  | 3     | 15    | 17  | 22un | -   |
| <b>SmaUSC-E15</b> | 3     | -     | 17  | -    | -   |
| <b>SMAC09</b>     | 3     | un    | 17  | 22   | -   |
| <b>1/4AC18</b>    | 3     | 15    | 17  | 22   | 22  |
| <b>Sma-USC271</b> | 3     | -     | -   | -    | -   |
| <b>SmaSNP204</b>  | 3     | 15    | 17  | 22un | 2   |
| <b>Sma-E277</b>   | 3     | -     | -   | 22   | -   |
| <b>SMAC07</b>     | 3     | un    | 17  | 22   | -   |
| Sma-USC218        | sc111 | un    | -   | 12un | -   |
| Sma-USC222        | 10    | 21    | 11  | 12   | -   |
| <i>SmaSNP19</i>   | 10    | un    | 11  | 12   | 19  |
| <i>SmaSNP153</i>  | 10    | un    | 11  | 12   | 19  |

| LG02              | Gac  | Tetr | Ola | Tru | Dre |
|-------------------|------|------|-----|-----|-----|
| <i>SmaSNP143</i>  | 20   | 8    | 16  | 7   | -   |
| <i>SmaSNP145</i>  | 20   | 8    | 16  | 7   | 16  |
| <i>SmaSNP40</i>   | 6    | 17   | -   | 4   | -   |
| <i>Sma-USC51</i>  | -    | 2    | 19  | 1   | -   |
| <i>SmaUSC-E17</i> | 6    | -    | -   | -   | -   |
| <b>Sma-USC46</b>  | 20   | 8    | 16  | 7   | -   |
| <i>SmaSNP103</i>  | 1    | 3    | -   | 8   | 7   |
| <b>Sma-USC242</b> | 20   | -    | -   | -   | -   |
| <i>SMAC01</i>     | sc47 | -    | -   | -   | 7   |
| <i>SmaSNP149</i>  | 1    | 3    | -   | -   | -   |
| <b>Sma-USC168</b> | 20   | 8    | -   | -   | -   |
| <i>SmaSNP71</i>   | 20   | 8    | -   | -   | -   |
| <i>SmaSNP30</i>   | 20   | 8    | 16  | -   | 16  |
| <b>Sma-USC84</b>  | 20   | -    | 16  | -   | -   |
| <b>Sma-USC249</b> | -    | -    | 16  | -   | -   |
| <b>Sma-USC185</b> | -    | -    | 16  | -   | -   |
| <i>Sma-USC36</i>  | 20   | -    | -   | -   | -   |
| <b>Sma-USC187</b> | 1    | -    | 2   | 8   | -   |
| <i>Sma-USC64</i>  | 20   | 8    | 16  | -   | -   |
| <b>Sma-USC43</b>  | sc74 | -    | 2   | -   | -   |

| LG03              | Gac | Tetr | Ola   | Tru | Dre |
|-------------------|-----|------|-------|-----|-----|
| <i>Sma-USC93</i>  | 15  | un   | sc604 | 2   | -   |
| <b>Sma-USC17</b>  | -   | 10   | -     | 2   | -   |
| <b>SmaUSC-E34</b> | 15  | 10   | 22    | 2   | -   |
| <b>Sma-USC157</b> | 15  | 10   | 22    | 2   | -   |
| <b>Sma-USC179</b> | 15  | 10   | -     | -   | -   |
| <b>Sma-E118</b>   | 15  | 10   | 22    | 2   | -   |
| <b>Sma-E72</b>    | 15  | 10   | 22    | 2   | -   |
| <b>Sma-E272</b>   | -   | 10   | -     | -   | -   |

| LG04              | Gac | Tetr | Ola | Tru | Dre     |
|-------------------|-----|------|-----|-----|---------|
| <i>SmaSNP190</i>  | 2   | 5    | 3   | 13  | 18      |
| <b>SmaSNP181</b>  | 2   | 5    | 3   | 13  | 7       |
| <b>Sma-USC100</b> | 2   | 5    | 3   | 13  | -       |
| <b>Sma-USC167</b> | -   | -    | -   | 17  | -       |
| <b>Sma-USC102</b> | 2   | 5    | 3   | 13  | sc_3485 |

| LG05              | Gac | Tetr | Ola | Tru  | Dre |
|-------------------|-----|------|-----|------|-----|
| <b>SmaUSC-E30</b> | 8   | -    | -   | -    | -   |
| <b>SmaSNP31</b>   | 8   | 1    | -   | 20   | -   |
| <b>Sma-USC12</b>  | 8   | 1    | 4   | 20   | 8   |
| <b>Sma-USC202</b> | 8   | -    | -   | -    | -   |
| <b>Sma-USC265</b> | 8   | 1    | 4   | 20   | -   |
| <b>Sma-USC88</b>  | 8   | 1    | -   | 20   | -   |
| <b>Sma-E254</b>   | -   | -    | 4   | -    | -   |
| <b>Sma-USC225</b> | 8   | un   | -   | 20un | -   |

| LG06              | Gac | Tetr | Ola  | Tru | Dre |
|-------------------|-----|------|------|-----|-----|
| <i>SmaUSC-E7</i>  | 19  | 13   | uc72 | 9   | -   |
| <b>SmaSNP29</b>   | 19  | 13   | -    | -   | 25  |
| <b>Sma-USC188</b> | 19  | -    | -    | -   | -   |
| <b>Sma-USC107</b> | 19  | 13   | -    | 9   | -   |
| <b>Sma-USC110</b> | 19  | 13   | 6    | 9   | 18  |
| <b>SmaUSC-E29</b> | 19  | 13   | 6    | 9   | 25  |
| <b>Sma-E315</b>   | 19  | 13   | 6    | 9   | 25  |
| <b>Sma-USC132</b> | -   | -    | -    | -   | 6   |
| <b>Sma-USC264</b> | 19  | -    | -    | -   | -   |

| LG08              | Gac | Tetr | Ola | Tru  | Dre |
|-------------------|-----|------|-----|------|-----|
| <b>Sma-USC194</b> | 7   | -    | -   | -    | -   |
| <b>Sma-E218</b>   | 7   | 7    | -   | 15   | 18  |
| <b>SMAC08</b>     | 7   | 7    | 14  | 15   | 5   |
| <b>SmaUSC-E43</b> | 7   | 7    | 14  | 15un | 5   |
| <b>SmaSNP147</b>  | 7   | -    | -   | -    | -   |
| <i>Sma-USC269</i> | 7   | 7    | 14  | 15   | -   |
| <b>Sma-USC170</b> | 14  | 4    | 12  | 6    | 21  |
| <b>Sma-USC18</b>  | 7   | -    | -   | 8    | -   |

| LG09              | Gac | Tetr | Ola | Tru  | Dre |
|-------------------|-----|------|-----|------|-----|
| <i>SmaSNP61</i>   | -   | 18   | -   | -    | -   |
| <b>Sma-USC216</b> | 9   | -    | 1   | 17   | -   |
| <b>Sma-USC150</b> | 9   | -    | -   | -    | -   |
| <b>Sma-USC118</b> | 21  | -    | -   | -    | -   |
| <b>SmaUSC-E16</b> | 9   | -    | 1   | 17   | -   |
| <b>Sma-E99</b>    | -   | -    | -   | -    | 1   |
| <i>SmaSNP100</i>  | 9   | 18   | -   | 17   | 1   |
| <i>SmaUSC-E36</i> | 9   | 18   | 1   | 17   | -   |
| <b>Sma-USC126</b> | 9   | 18   | 1   | 17   | -   |
| <b>SmaUSC-E23</b> | 9   | 18   | 1   | -    | -   |
| <b>Sma-E71</b>    | 9   | 18   | 1   | 17   | 1   |
| <b>SmaSNP35</b>   | 9   | un   | -   | -    | -   |
| <b>Sma-E197</b>   | 9   | un   | -   | -    | 3   |
| <b>Sma-E139</b>   | 18  | 14   | 24  | 16   | 20  |
| <b>SmaUSC-E5</b>  | -   | -    | 1   | -    | -   |
| <b>Sma-E302</b>   | 9   | 18   | 1   | 17   | -   |
| <b>F12-ITG16</b>  | -   | un   | -   | -    | -   |
| <b>SmaUSC-E41</b> | 9   | 18   | 1   | 17un | 3   |
| <b>Sma-USC57</b>  | 1   | -    | -   | -    | -   |
| <b>Sma-E248</b>   | -   | un   | 1   | un   | 19  |
| <b>SmaUSC-E2</b>  | 9   | -    | -   | -    | -   |
| <b>Sma-USC21</b>  | 9   | 18   | 1   | 17   | -   |
| <b>Sma-E117</b>   | 9   | un   | -   | 17   | -   |
| <b>SMAC05</b>     | 9   | un   | 1   | 17   | 1   |
| <b>Sma-USC226</b> | 9   | -    | -   | -    | -   |

| LG10              | Gac   | Tetr | Ola  | Tru | Dre |
|-------------------|-------|------|------|-----|-----|
| <i>SmaSNP64</i>   | 12    | -    | 7    | 3   | 23  |
| <i>Sma-USC175</i> | 12    | -    | -    | -   | -   |
| <b>Sma-USC217</b> | sc68  | 9    | 7    | 3   | -   |
| <b>SmaUSC-E20</b> | sc68  | -    | 7    | -   | -   |
| <b>SmaUSC-E27</b> | 12    | 9    | -    | 3   | -   |
| <b>SmaUSC-E32</b> | sc114 | un   | uc90 | -   | -   |
| <b>Sma-USC162</b> | sc180 | -    | 7    | -   | 23  |
| <b>SmaSNP157</b>  | 12    | un   | 7    | -   | -   |
| <b>Sma-USC244</b> | sc114 | un   | uc90 | 3   | -   |
| <b>Sma-USC113</b> | -     | 9    | 7    | 3   | -   |
| <b>Sma-USC96</b>  | 12    | -    | -    | -   | 23  |
| <b>Sma-E144</b>   | -     | 5    | -    | -   | -   |
| <b>Sma-E290</b>   | 12    | un   | 7    | un  | -   |
| <b>Sma-E224</b>   | 12    | un   | 7    | un  | -   |
| <b>Sma-USC79</b>  | -     | un   | 7    | un  | 8   |
| <i>SmaSNP3</i>    | 12    | -    | 7    | 3   | 8   |

| LG07               | Gac | Tetr | Ola   | Tru  | Dre |
|--------------------|-----|------|-------|------|-----|
| <b>Sma-USC206</b>  | 4   | -    | 10    | 14   | -   |
| <b>SmaSNP62</b>    | 4   | 1    | -     | un   | 9   |
| <b>Sma-E100</b>    | 4   | 1    | 10    | 14   | -   |
| <b>B11-112/6/3</b> | 4   | -    | 10    | -    | -   |
| <b>Sma-USC135</b>  | 4   | un   | 10    | 14un | -   |
| <b>Sma-USC272</b>  | 4   | 1    | 10    | 14   | -   |
| <i>Sma-USC37</i>   | -   | -    | -     | 14   | -   |
| <b>Sma-E78</b>     | 4   | -    | 10    | 14un | 14  |
| <b>Sma-E194</b>    | 4   | 20   | uc115 | 14   | -   |

| LG11              |      |           |        |     | LG12 |                   |     |           |     | LG13      |      |                   |       |           | LG14 |      |     |                   |     |           |    |   |           |  |
|-------------------|------|-----------|--------|-----|------|-------------------|-----|-----------|-----|-----------|------|-------------------|-------|-----------|------|------|-----|-------------------|-----|-----------|----|---|-----------|--|
| Gac               | Tetr | Ola       | Tru    | Dre | Gac  | Tetr              | Ola | Tru       | Dre | Gac       | Tetr | Ola               | Tru   | Dre       | Gac  | Tetr | Ola | Tru               | Dre |           |    |   |           |  |
| <i>SmaSNP87</i>   | sc27 | -         | sc1179 | 19  | -    | <i>Sma-USC169</i> | 13  | -         | -   | -         | -    | <b>Sma-USC280</b> | -     | <i>un</i> | -    | 5    | -   | <i>Sma-E50</i>    | 14  | -         | -  | 6 | -         |  |
| <b>Sma-USC201</b> | sc27 | -         | 5      | 19  | -    | <i>SmaUSC-E25</i> | 13  | 12        | -   | 21        | 5    | <b>Sma-E82</b>    | 11    | <b>un</b> | 8    | 5    | -   | <i>SmaSNP200</i>  | 14  | 4         | 12 | 6 | <b>un</b> |  |
| <b>Sma-USC152</b> | sc27 | -         | -      | -   | -    | <b>Sma-USC60</b>  | 13  | -         | -   | -         | -    | <b>Sma-USC76</b>  | sc151 | -         | 8    | -    | -   | <i>SmaSNP32</i>   | -   | -         | 12 | 6 | 5         |  |
| <b>Sma-USC158</b> | 17   | -         | -      | 19  | -    | <b>SmaSNP140</b>  | 13  | <i>un</i> | 9   | <b>un</b> | -    | <i>SmaSNP150</i>  | 11    | 3         | 8    | -    | -   | <i>SmaSNP45</i>   | 14  | 4         | 12 | - | -         |  |
| <b>SmaUSC-E24</b> | 17   | -         | -      | 19  | -    | <b>3/9CA15</b>    | 13  | -         | -   | 21        | -    | <b>Sma-USC16</b>  | -     | -         | 8    | -    | -   | <b>SmaUSC-E28</b> | 14  | -         | -  | - | 10        |  |
| <b>Sma-USC62</b>  | -    | -         | -      | 19  | -    | <b>4/4CA4/13</b>  | -   | -         | 9   | -         | -    | <b>Sma-E120</b>   | 11    | 3         | 8    | 5    | 3   | <b>Sma-USC85</b>  | 14  | -         | 12 | - | -         |  |
| <b>Sma-E96</b>    | 17   | -         | -      | -   | -    | <b>Sma-USC89</b>  | 13  | -         | 9   | 21        | -    | <b>Sma-E215</b>   | 11    | -         | -    | 1    | 12  | <b>Sma-USC82</b>  | -   | -         | -  | 6 | -         |  |
| <b>Sma-USC22</b>  | 17   | -         | -      | -   | -    | <b>Sma-USC20</b>  | -   | -         | -   | -         | 5    | <b>SmaUSC-E10</b> | 11    | 2         | -    | 1    | -   | <b>Sma-E164</b>   | 20  | <i>un</i> | 16 | 7 | -         |  |
| <i>Sma-E156</i>   | 17   | -         | -      | -   | -    | <b>SmaUSC-E14</b> | 13  | <i>un</i> | -   | 21        | -    | <b>SmaUSC-E38</b> | 11    | 3         | 8    | 5    | -   |                   |     |           |    |   |           |  |
| <b>Sma-USC235</b> | 17   | <i>un</i> | 5      | -   | -    | <b>Sma-USC19</b>  | 13  | -         | 9   | -         | -    | <b>Sma-USC155</b> | 11    | -         | -    | -    | 5   | -                 |     |           |    |   |           |  |
|                   |      |           |        |     |      | <b>Sma-USC133</b> | -   | -         | 9   | -         | -    | <i>SmaSNP44</i>   | -     | -         | -    | -    | 3   | -                 |     |           |    |   |           |  |
|                   |      |           |        |     |      | <b>Sma-USC56</b>  | 13  | -         | -   | -         | -    | <b>SmaSNP192</b>  | 11    | 3         | -    | 5    | 3   | -                 |     |           |    |   |           |  |
|                   |      |           |        |     |      | <b>SmaSNP73</b>   | -   | 12        | -   | 21        | 21   |                   |       |           |      |      |     |                   |     |           |    |   |           |  |
|                   |      |           |        |     |      | <b>SmaUSC-E21</b> | 13  | -         | -   | 21        | -    |                   |       |           |      |      |     |                   |     |           |    |   |           |  |
|                   |      |           |        |     |      | <b>SmaUSC-E22</b> | 13  | -         | -   | 21        | -    |                   |       |           |      |      |     |                   |     |           |    |   |           |  |
|                   |      |           |        |     |      | <i>Sma-E310</i>   | 13  | -         | -   | 21        | -    |                   |       |           |      |      |     |                   |     |           |    |   |           |  |
|                   |      |           |        |     |      | <b>SmaSNP126</b>  | 13  | -         | -   | 21        | -    |                   |       |           |      |      |     |                   |     |           |    |   |           |  |
|                   |      |           |        |     |      | <b>Sma-USC266</b> | 13  | 12        | 9   | 21        | 5    |                   |       |           |      |      |     |                   |     |           |    |   |           |  |

  

| LG16              |      |           |     |             | LG17 |                   |       |           |              | LG18         |      |                   |     |           | LG19         |              |     |                   |     |           |             |           |    |
|-------------------|------|-----------|-----|-------------|------|-------------------|-------|-----------|--------------|--------------|------|-------------------|-----|-----------|--------------|--------------|-----|-------------------|-----|-----------|-------------|-----------|----|
| Gac               | Tetr | Ola       | Tru | Dre         | Gac  | Tetr              | Ola   | Tru       | Dre          | Gac          | Tetr | Ola               | Tru | Dre       | Gac          | Tetr         | Ola | Tru               | Dre |           |             |           |    |
| <i>Sma-E279</i>   | -    | <i>un</i> | -   | 8 <i>un</i> | -    | <b>Sma-USC91</b>  | 21    | -         | -            | 10           | -    | <b>SmaUSC-E40</b> | 7   | 7         | <i>uc170</i> | -            | -   | <b>3/20CA17</b>   | 4   | 19        | 23          | 18        | -  |
| <b>Sma-E137</b>   | 7    | <b>un</b> | 18  | 8 <i>un</i> | -    | <b>Sma-E112</b>   | 21    | -         | 20           | -            | -    | <b>SmaUSC-E13</b> | 7   | 7         | <b>uc170</b> | -            | -   | <i>SmaSNP101</i>  | -   | -         | -           | 4         | -  |
| <b>Sma-USC128</b> | 4    | <b>un</b> | 23  | 18          | 4    | <b>Smax-02</b>    | 21    | -         | 20           | 10           | -    | <b>Sma-E195</b>   | 7   | 7         | <i>uc170</i> | -            | -   | <i>SmaSNP74</i>   | 6   | 17        | -           | 4         | -  |
| <b>Sma-USC136</b> | 4    | 19        | 23  | -           | -    | <b>Sma-USC138</b> | 21    | <b>un</b> | -            | 10           | -    | <b>Sma-USC160</b> | -   | 7         | -            | 15 <i>un</i> | 7   | <i>SmaSNP28</i>   | 6   | 17        | 15          | 4         | -  |
| <b>3/20CA17</b>   | 4    | 19        | 23  | 18          | -    | <b>Sma-USC55</b>  | 21    | -         | -            | 10 <i>un</i> | 12   | <b>SmaUSC-E19</b> | 7   | <b>un</b> | 14           | 15           | -   | <i>Sma-E142</i>   | 6   | <b>un</b> | 15          | 4         | -  |
| <b>Sma-USC282</b> | 4    | -         | 23  | 18          | -    | <b>Sma-E159</b>   | sc37  | <b>un</b> | <i>uc236</i> | <b>un</b>    | -    |                   |     |           |              |              |     | <i>Sma-USC108</i> | 6   | -         | -           | -         | -  |
| <b>Sma-USC285</b> | 4    | 19        | 23  | 18          | -    | <b>Sma-USC134</b> | 21    | 6         | -            | 10           | -    |                   |     |           |              |              |     | <b>Sma-E205</b>   | 6   | -         | sc521       | <b>un</b> | 13 |
| <b>Sma-USC223</b> | 4    | 19        | 23  | 18          | -    | <b>Sma-USC142</b> | sc67  | -         | -            | 10           | -    |                   |     |           |              |              |     | <b>Sma-USC86</b>  | 6   | 17        | -           | -         | -  |
| <b>Sma-E183</b>   | 4    | 19        | 23  | 18          | 4    | <b>Sma-E184</b>   | sc126 | -         | 20           | 10           | -    |                   |     |           |              |              |     | <i>Sma-USC263</i> | 6   | -         | -           | -         | -  |
|                   |      |           |     |             |      | <b>SmaUSC-E1</b>  | sc126 | <b>un</b> | 20           | 10           | 24   |                   |     |           |              |              |     | <b>Smax-04b</b>   | 6   | 17        | -           | 4         | -  |
|                   |      |           |     |             |      |                   |       |           |              |              |      |                   |     |           |              |              |     | <b>Sma-USC23</b>  | -   | -         | <i>uc72</i> | 4         | -  |

  

| LG20             |      |     |     |           | LG21 |                   |     |     |     | LG22 |      |                   |     |              | LG23   |           |     |                   |     |    |    |    |    |
|------------------|------|-----|-----|-----------|------|-------------------|-----|-----|-----|------|------|-------------------|-----|--------------|--------|-----------|-----|-------------------|-----|----|----|----|----|
| Gac              | Tetr | Ola | Tru | Dre       | Gac  | Tetr              | Ola | Tru | Dre | Gac  | Tetr | Ola               | Tru | Dre          | Gac    | Tetr      | Ola | Tru               | Dre |    |    |    |    |
| <i>SmaSNP163</i> | 1    | -   | 13  | <i>un</i> | -    | <b>SmaSNP210</b>  | 20  | 8   | 16  | 7    | -    | <i>Sma-E91</i>    | 1   | <b>un</b>    | sc2179 | <b>un</b> | 18  | <b>Sma-E168</b>   | 18  | 14 | 24 | 16 | 20 |
| <b>SmaSNP194</b> | -    | -   | 21  | -         | -    | <b>Sma-USC231</b> | -   | 2   | 19  | 1    | -    | <i>SmaSNP141</i>  | 10  | 21 <i>un</i> | 11     | 12        | 15  | <b>Sma-USC273</b> | 18  | 14 | 24 | 16 | -  |
| <b>Sma-USC29</b> | -    | -   | -   | 1         | -    | <b>Sma-USC234</b> | 5   | -   | -   | -    | -    | <b>Sma-E167</b>   | 10  | <b>un</b>    | 11     | -         | 16  | <b>Sma-USC38</b>  | 18  | 14 | -  | 16 | -  |
| <b>Sma-E189</b>  | -    | 2   | -   | 1         | 1    | <b>Sma-E316</b>   | 5   | -   | 19  | 1    | 12   | <b>SmaUSC-E39</b> | 10  | 21 <i>un</i> | -      | 12        | -   | <b>Sma-USC54</b>  | -   | -  | 24 | -  | -  |
| <b>Sma-E244</b>  | 16   | 2   | 21  | 1         | -    |                   |     |     |     |      |      | <b>Sma-USC58</b>  | 10  | -            | -      | -         | -   | <b>SmaSNP68</b>   | 18  | -  | -  | -  | -  |
| <b>Sma-E270</b>  | -    | 2   | 21  | 1         | -    |                   |     |     |     |      |      | <i>SmaSNP160</i>  | 10  | -            | -      | -         | -   | <b>Sma-E127</b>   | 18  | 14 | 24 | 16 | -  |
|                  |      |     |     |           |      |                   |     |     |     |      |      |                   |     |              |        |           |     | <b>Sma-E154</b>   | -   | -  | 24 | -  | -  |
|                  |      |     |     |           |      |                   |     |     |     |      |      |                   |     |              |        |           |     | <b>SmaUSC-E33</b> | -   | 14 | -  | 16 | -  |
|                  |      |     |     |           |      |                   |     |     |     |      |      |                   |     |              |        |           |     | <i>SmaUSC-E31</i> | 18  | -  | -  | 16 | 20 |

**FIGURE S3. Comparative mapping between the turbot map and the five model teleost genomes.** Turbot linkage groups: LG1-LG24; stickleback (Gac), Tetraodon (Tni), Medaka (Ola), Fugu (Tru) and zebrafish (Dre). Markers yielding significant matches against at least one model fish genome are ordered on the left of each turbot linkage group (framework markers in boldface, markers at LOD<3.0 in normal type and accessory markers in italic type; see Figure 1 and Table S1). Details on similarity matches against each model genome are recorded as either the number of the specific chromosome or as the code of the unallocated genomic regions of the model species: (sc) stickleback or medaka scaffolds, (uc) medaka ultracontigs, (un) unrandom genomic or unassigned chromosomal sequences of *Tetraodon* and fugu. The significant unique hits under  $E \leq 10^{-5}$  threshold are presented in boldface type; the remaining at  $E < 10^{-10}$  in italic type.
