# Supplementary material for: An Expressed Sequence Tag (EST)-enriched genetic map of turbot (Scophthalmus maximus): a useful framework for comparative genomics across model and farmed teleosts
Source: PubMed Central journal article supplement (PMC3464660; doi:10.1186/1471-2156-13-54), 2012-07-02
Supplement: 1471-2156-13-54-S4.pdf [file 1471-2156-13-54-S4.pdf]

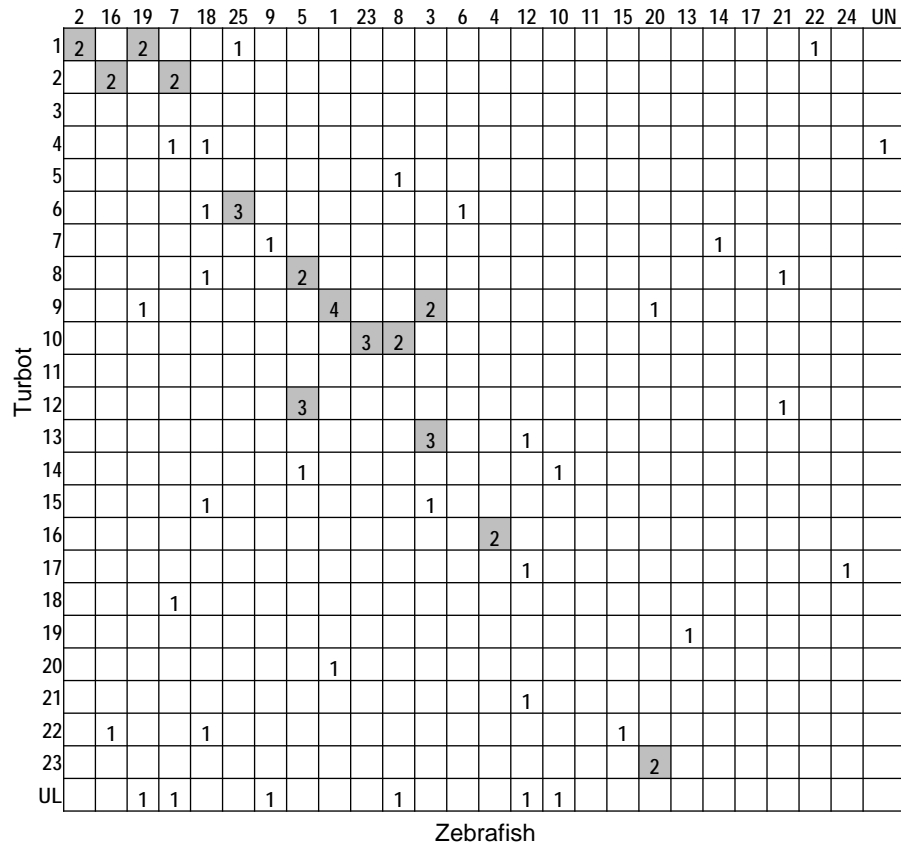

**FIGURE S4. Oxford grid showing syntenies between the turbot linkage map and the zebrafish genome.** In gray background syntenies with two or more significant hits. UL: unlinked markers in the turbot map; UN: unrandom genomic regions of the model fish species.
